# Supplementary material
Source: Springer Nature journal article supplement (https://www.springermedizin.de/resource/supplementary/12889_2013_7052_MOESM5_ESM.pdf/9499698)
Supplement: MOESM5 [file 9499698]

**Supplemental table 4: Factors associated with the average agreement score (univariate multilevel linear regression), in total and by country**

|                                         |              | Total        |              |              | Belgium      |              | Greece       |       |       | Hungary |              |              | Netherlands  |              |              | Norway       |              |              | Slovenia     |              |              | Spain        |              |              | Switzerland |       |              |             |  |
|-----------------------------------------|--------------|--------------|--------------|--------------|--------------|--------------|--------------|-------|-------|---------|--------------|--------------|--------------|--------------|--------------|--------------|--------------|--------------|--------------|--------------|--------------|--------------|--------------|--------------|-------------|-------|--------------|-------------|--|
|                                         |              | b*           | 95%CI        |              | b†           | 95%CI        |              | b†    | 95%CI |         | b†           | 95%CI        |              | b†           | 95%CI        |              | b†           | 95%CI        |              | b†           | 95%CI        |              | b†           | 95%CI        |             |       |              |             |  |
| <i>Child characteristics</i>            |              |              |              |              |              |              |              |       |       |         |              |              |              |              |              |              |              |              |              |              |              |              |              |              |             |       |              |             |  |
| <b>Gender</b>                           |              |              |              |              |              |              |              |       |       |         |              |              |              |              |              |              |              |              |              |              |              |              |              |              |             |       |              |             |  |
|                                         | Boy          | <b>-1.82</b> | <b>-2.53</b> | <b>-1.10</b> | <b>-2.33</b> | <b>-4.40</b> | <b>-0.25</b> | -1.44 | -3.22 | 0.35    | -1.31        | -3.20        | 0.58         | -1.46        | -4.14        | 1.23         | <b>-3.00</b> | <b>-4.92</b> | <b>-1.08</b> | <b>-1.62</b> | <b>-3.54</b> | <b>0.29</b>  | <b>-1.80</b> | <b>-3.65</b> | <b>0.05</b> | -1.44 | <b>-3.85</b> | <b>0.97</b> |  |
| <b>Age</b>                              |              |              |              |              |              |              |              |       |       |         |              |              |              |              |              |              |              |              |              |              |              |              |              |              |             |       |              |             |  |
|                                         | 10 years     | 0.55         | -0.39        | 1.49         | 0.39         | -2.14        | 2.92         | -1.40 | -3.39 | 0.60    | 1.01         | -10.68       | 12.70        | -0.21        | -3.88        | 3.47         | <b>4.06</b>  | <b>0.85</b>  | <b>7.26</b>  | <b>2.05</b>  | <b>-0.14</b> | <b>4.24</b>  | 1.35         | -0.83        | 3.54        | -1.96 | -5.05        | 1.12        |  |
|                                         | 12 years     | <b>1.41</b>  | <b>0.35</b>  | <b>2.46</b>  | 0.31         | -2.59        | 3.21         | 0.85  | -1.74 | 3.43    | 1.52         | -10.13       | 13.18        | 1.71         | -2.17        | 5.60         | <b>4.50</b>  | <b>1.32</b>  | <b>7.68</b>  | <b>0.76</b>  | <b>-1.91</b> | <b>3.43</b>  | 3.71         | 1.08         | 6.34        | -0.10 | -3.53        | 3.33        |  |
|                                         | 13 years     | <b>3.01</b>  | <b>0.78</b>  | <b>5.23</b>  | 8.53         | -1.07        | 18.13        | n.a.  |       |         | 3.15         | -8.82        | 15.13        | -6.77        | -18.81       | 5.27         | <b>6.43</b>  | <b>2.06</b>  | <b>10.79</b> | -16.07       | -37.14       | 4.99         | 2.24         | -14.08       | 18.55       | -1.19 | -8.14        | 5.76        |  |
| <b>Weight status</b>                    |              |              |              |              |              |              |              |       |       |         |              |              |              |              |              |              |              |              |              |              |              |              |              |              |             |       |              |             |  |
|                                         | Normal       |              |              |              |              |              |              |       |       |         |              |              |              |              |              |              |              |              |              |              |              |              |              |              |             |       |              |             |  |
|                                         | Overweight   | <b>-1.28</b> | <b>-2.15</b> | <b>-0.41</b> | -0.85        | -3.80        | 2.11         | -0.68 | -2.51 | 1.15    | <b>-2.26</b> | <b>-4.48</b> | <b>-0.04</b> | -1.67        | -5.85        | 2.50         | -0.74        | -3.52        | 2.05         | <b>-2.22</b> | <b>-4.43</b> | <b>-0.02</b> | -0.82        | -2.99        | 1.35        | -1.19 | -4.79        | 2.40        |  |
|                                         | Underweight  | -0.22        | -1.55        | 1.11         | -0.21        | -3.42        | 3.01         | 0.28  | -4.51 | 5.08    | -0.53        | -3.67        | 2.62         | 2.13         | -2.17        | 6.44         | -3.04        | -6.72        | 0.64         | 0.72         | -3.04        | 4.49         | -1.91        | -5.97        | 2.15        | 1.68  | -2.15        | 5.51        |  |
| <i>Parental characteristics</i>         |              |              |              |              |              |              |              |       |       |         |              |              |              |              |              |              |              |              |              |              |              |              |              |              |             |       |              |             |  |
| Parent                                  |              |              |              |              |              |              |              |       |       |         |              |              |              |              |              |              |              |              |              |              |              |              |              |              |             |       |              |             |  |
|                                         | Father       | -0.07        | -1.01        | 0.88         | 0.59         | -2.55        | 3.74         | 1.88  | -0.44 | 4.20    | -0.46        | -3.14        | 2.21         | 2.49         | -2.19        | 7.17         | -1.47        | -3.85        | 0.91         | -1.85        | -3.92        | 0.46         | 1.24         | -1.11        | 3.59        | -1.40 | -4.50        | 1.70        |  |
| <b>Age</b>                              |              |              |              |              |              |              |              |       |       |         |              |              |              |              |              |              |              |              |              |              |              |              |              |              |             |       |              |             |  |
|                                         | per year     | <b>0.12</b>  | <b>0.05</b>  | <b>0.19</b>  | 0.18         | -0.04        | 0.41         | 0.14  | -0.02 | 0.29    | 0.00         | -0.18        | 0.19         | 0.22         | -0.08        | 0.51         | <b>0.19</b>  | <b>0.00</b>  | <b>0.38</b>  | 0.20         | -0.11        | 0.29         | <b>0.13</b>  | <b>-0.08</b> | <b>0.34</b> | 0.12  | -0.09        | 0.34        |  |
| <b>BMI‡</b>                             |              |              |              |              |              |              |              |       |       |         |              |              |              |              |              |              |              |              |              |              |              |              |              |              |             |       |              |             |  |
|                                         | per kg/m2    | 0.00         | 0.00         | 0.00         | -0.11        | -0.35        | 0.14         | 0.00  | 0.00  | 0.00    | -0.07        | -0.28        | 0.14         | <b>-0.36</b> | <b>-0.65</b> | <b>-0.08</b> | -0.13        | -0.40        | 0.14         | <b>-0.35</b> | <b>-0.59</b> | <b>-0.12</b> | -0.2177      | -0.5         | 0.07        | 0.00  | 0.00         | 0.00        |  |
| <b>Education</b>                        |              |              |              |              |              |              |              |       |       |         |              |              |              |              |              |              |              |              |              |              |              |              |              |              |             |       |              |             |  |
|                                         | <14 yrs      |              |              |              |              |              |              |       |       |         |              |              |              |              |              |              |              |              |              |              |              |              |              |              |             |       |              |             |  |
|                                         | ≥ 14 yrs     | <b>2.41</b>  | <b>1.66</b>  | <b>3.17</b>  | 1.54         | -0.96        | 4.05         | 2.39  | 0.57  | 4.20    | 1.19         | -0.72        | 3.10         | 0.23         | -2.72        | 3.19         | <b>4.03</b>  | <b>2.02</b>  | <b>6.04</b>  | <b>4.85</b>  | <b>2.92</b>  | <b>6.79</b>  | 1.72         | -0.38        | 3.82        | 0.48  | -2.16        | 3.12        |  |
| Employment                              |              |              |              |              |              |              |              |       |       |         |              |              |              |              |              |              |              |              |              |              |              |              |              |              |             |       |              |             |  |
|                                         | No           | -0.94        | -1.99        | 0.10         | -0.65        | -4.43        | 3.12         | -1.70 | -4.03 | 0.62    | -0.66        | -3.22        | 1.90         | 2.63         | -0.68        | 5.93         | -2.03        | -5.93        | 1.87         | -2.32        | -5.84        | 1.21         | -2.27        | -4.69        | 0.16        | 1.77  | -1.22        | 4.75        |  |
| <b>Perception of the child's weight</b> |              |              |              |              |              |              |              |       |       |         |              |              |              |              |              |              |              |              |              |              |              |              |              |              |             |       |              |             |  |
|                                         | Normal       |              |              |              |              |              |              |       |       |         |              |              |              |              |              |              |              |              |              |              |              |              |              |              |             |       |              |             |  |
|                                         | Overweight   | <b>-1.18</b> | <b>-2.07</b> | <b>-0.30</b> | 1.61         | -1.13        | 4.36         | -0.30 | -2.21 | 1.60    | <b>-2.84</b> | <b>-5.08</b> | <b>-0.59</b> | 1.34         | -2.42        | 5.11         | -1.76        | -4.76        | 1.24         | -2.68        | -4.93        | -0.44        | -2.12        | -4.42        | 0.18        | 0.28  | -3.09        | 3.65        |  |
|                                         | Underweight  | <b>-1.40</b> | <b>-2.55</b> | <b>-0.25</b> | -0.24        | -3.63        | 3.14         | -0.23 | -3.35 | 2.90    | <b>-4.07</b> | <b>-6.95</b> | <b>-1.18</b> | -2.24        | -6.60        | 2.12         | <b>-3.39</b> | <b>-6.64</b> | <b>-0.14</b> | -0.89        | -4.12        | 2.33         | -1.66        | -4.35        | 1.02        | 2.77  | -1.03        | 6.56        |  |
| <i>Family characteristics</i>           |              |              |              |              |              |              |              |       |       |         |              |              |              |              |              |              |              |              |              |              |              |              |              |              |             |       |              |             |  |
| Native language at home                 |              |              |              |              |              |              |              |       |       |         |              |              |              |              |              |              |              |              |              |              |              |              |              |              |             |       |              |             |  |
|                                         | Yes          | 0.42         | -1.05        | 1.89         | 1.15         | -2.90        | 5.19         | -1.55 | -4.79 | 1.68    | 0.75         | 3.21         | 0.23         | -5.70        | -11.66       | 0.26         | 2.30         | -2.91        | 7.52         | <b>5.24</b>  | <b>1.55</b>  | <b>8.93</b>  | -4.08        | -9.78        | 1.63        | -0.38 | -3.39        | 2.63        |  |
| Siblings                                |              |              |              |              |              |              |              |       |       |         |              |              |              |              |              |              |              |              |              |              |              |              |              |              |             |       |              |             |  |
|                                         | Yes          | 0.20         | -0.78        | 1.19         | 2.19         | -0.63        | 5.02         | 0.31  | -2.04 | 2.66    | -1.22        | -3.49        | 1.04         | 2.59         | -2.29        | 7.47         | -0.14        | -3.28        | 3.00         | 0.42         | -2.26        | 3.11         | 0.30         | -2.18        | 2.79        | -0.80 | -4.41        | 2.81        |  |
| Living with                             |              |              |              |              |              |              |              |       |       |         |              |              |              |              |              |              |              |              |              |              |              |              |              |              |             |       |              |             |  |
|                                         | Both parents |              |              |              |              |              |              |       |       |         |              |              |              |              |              |              |              |              |              |              |              |              |              |              |             |       |              |             |  |
|                                         | Mother or    |              |              |              |              |              |              |       |       |         |              |              |              |              |              |              |              |              |              |              |              |              |              |              |             |       |              |             |  |
|                                         | Father       | -1.22        | -2.47        | 0.03         | -0.27        | -4.03        | 3.49         | -2.45 | -5.79 | 0.90    | -0.48        | -3.34        | 2.39         | -2.55        | -6.77        | 1.67         | 1.56         | -1.67        | 4.80         | -4.08        | -7.82        | -0.34        | -2.41        | -6.48        | 1.65        | 0.28  | -3.09        | 3.65        |  |
|                                         | Other        | -1.15        | -2.55        | 0.25         | -6.62        | -13.52       | 0.29         | -1.01 | -3.71 | 1.69    | -2.06        | -5.19        | 1.08         | -1.68        | -20.15       | 16.78        | -0.39        | -8.10        | 7.31         | -0.47        | -3.45        | 2.51         | 0.66         | -2.71        | 4.03        | 2.77  | -1.03        | 6.56        |  |

Abbreviations: BMI, body mass index; CI, confidence interval

\* Univariate multilevel linear regression model (country, school) with agreement score as outcome

† Univariate multilevel linear regression model (school) with agreement score as outcome

‡ Adjusted for parent's gender

Numbers in bold represent statistically significant associations with the overall agreement score (P <0.05)
